# Supplementary material for: Identification and characterization of the novel colonization factor CS30 based on whole genome sequencing in enterotoxigenic Escherichia coli (ETEC)
Source: PubMed Central journal article supplement (PMC5624918; doi:10.1038/s41598-017-12743-3), 2017-10-02
Supplement: 41598_2017_12743_MOESM1_ESM.pdf [file 41598_2017_12743_MOESM1_ESM.pdf]

## Supplementary Information

### **Identification and characterization of the novel colonization factor CS30 based on whole genome sequencing in enterotoxigenic *Escherichia coli* (ETEC)**

**Astrid von Mentzer<sup>1,\*</sup>, Joshua Tobias<sup>1</sup>, Gudrun Wiklund<sup>1</sup>, Stefan Nordqvist<sup>1</sup>, Martin Aslett<sup>2</sup>, Gordon Dougan<sup>3</sup>, Åsa Sjöling<sup>4</sup>, Ann-Mari Svennerholm<sup>1</sup>**

<sup>1</sup>Department of Microbiology and Immunology, Sahlgrenska Academy, University of Gothenburg, Sweden

<sup>2</sup>Pathogen Genomics, The Wellcome Trust Sanger Institute, Hinxton, Cambridge United Kingdom

<sup>3</sup>Microbial Pathogenesis Group, The Wellcome Trust Sanger Institute, Hinxton, Cambridge United Kingdom

<sup>4</sup>Department of Microbiology, Tumor and Cellbiology, Karolinska Institutet, Stockholm, Sweden

\* [astrid.von.mentzer@gu.se](mailto:astrid.von.mentzer@gu.se)

## Supplementary Information

### FIGURES

|                        |                                                               |     |
|------------------------|---------------------------------------------------------------|-----|
| Putative major subunit | APADNDASKATLNFSGRVTSSLQVKTDDLTKDISLGEVSKSALAASGKGAQSFQVNLI    | 60  |
| FasA 987P              | APAENNTSQANLDFTGKVTASLCQVDTSNLSQTIDLGELSTSALKATGKGPAAKFAVNLI  | 60  |
|                        | ***:*::*:*.*:*:*:*:*:*:*:*:*:*.*:*:*.*** *:*****:* ****       |     |
|                        |                                                               |     |
| Putative major subunit | NCDTTTNDISYVLADANGNGANGASTYLVPKSGDTAAEGVGVFVETSNGTKVNIGTAQ    | 120 |
| FasA 987P              | NCDTTLNSIKYTIAGNNNTG----SDTKYLVPASNDTSASGVGVYIQDNNQAQAVEIGTEK | 116 |
|                        | ***** *.*.*.* * * . * . :.***** * **:*.******::.*. *:*:* :.   |     |
|                        |                                                               |     |
| Putative major subunit | TLNVVSNGATALSEQVIPLRAYIGTQNGTGGTIGTNGLKAGTVDATGVLTRIRANYKANTP | 180 |
| FasA 987P              | TVPVVSNGLALSQSIPLQAYIGTTTTGNPDT--NGGVTAGTVTASAVMTIRSAGTP*--   | 171 |
|                        | *: *****. ***:* ***:***** .* * . *:***** *:.*:****: .         |     |
|                        |                                                               |     |
| Putative major subunit | * 180                                                         |     |
| FasA 987P              | - 171                                                         |     |

**Figure S1. Amino acid sequence comparison between the putative major subunit and the major subunit FasA (987P).** The major subunits share 58.3% of the amino acid sequence. Isolate E873 was used as a representative for all isolates harboring the novel CF. Deduced amino acid sequences were aligned using ClustalO. Amino acids that are identical (\*), strongly similar (:), weakly similar (.) or different ( ) are indicated.

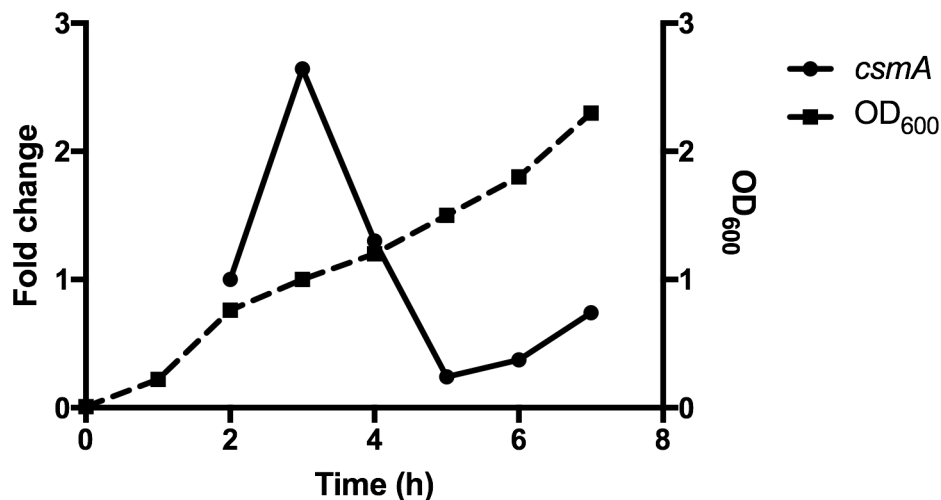

**Figure S2. Expression of the *csmA* gene in E873.** Dotted curve shows the growth curve ( $OD_{600} = 0.9$ ) of isolate E873 cultured at 37°C and the solid line the gene expression of *csmA* measured by qRT-PCR during seven hours. The highest expression was seen after three hours. Fold change is calculated relative to the expression levels at 2 hours at 37°C. Expressions at 20°C was virtually undetectable (not shown).

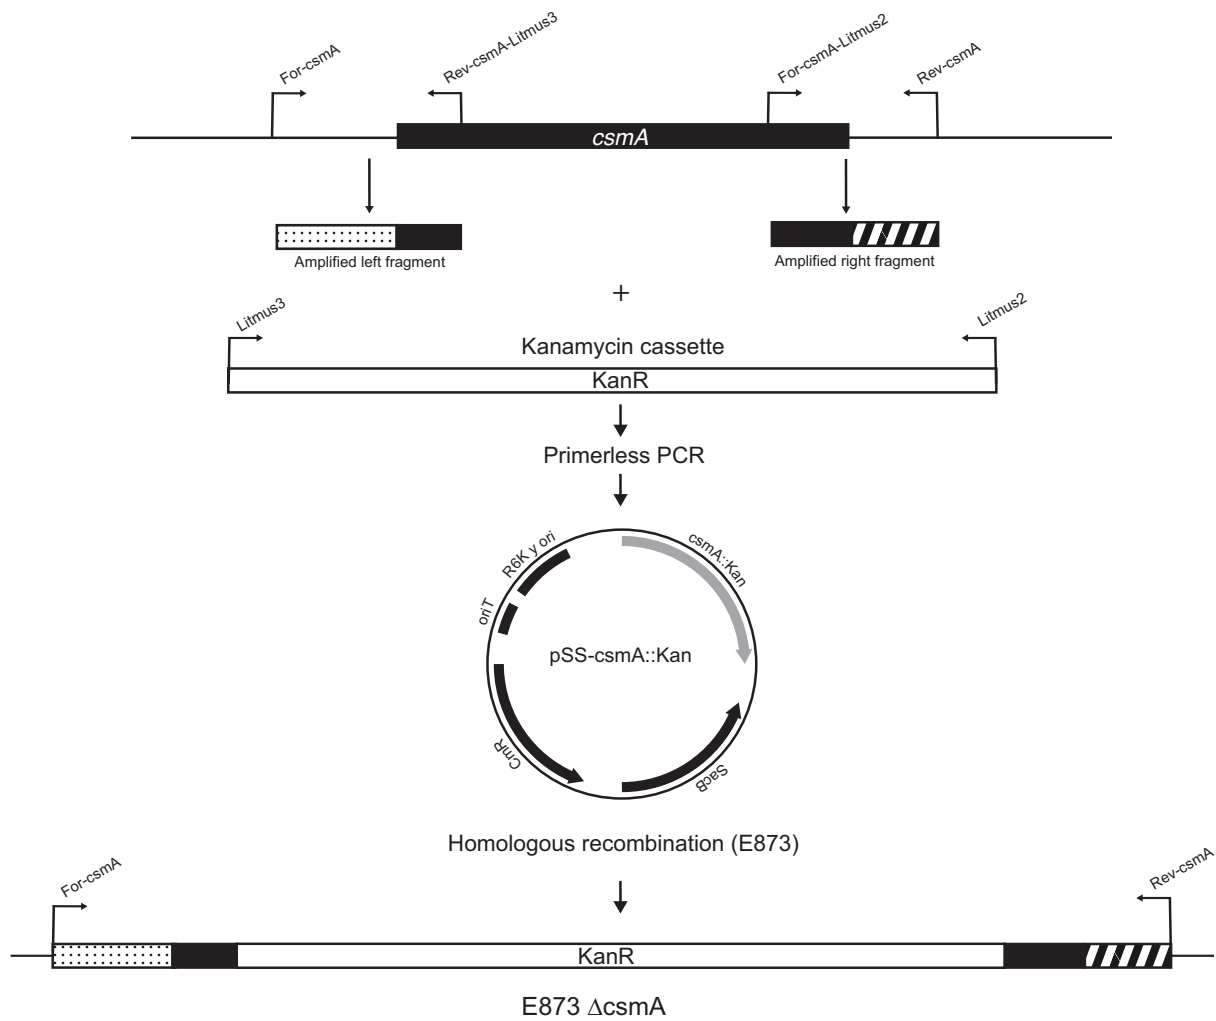

**Figure S3. A schematic figure over the construction of the E873  $\Delta$ csmA mutant.** Amplification of the left and the right fragment was performed to fuse together with pMT-suicide-SacB (pSS) in a primerless PCR. Incorporation of the *csmA*::Kan fragment was integrated into the pSS followed by integration by homologous recombination with the plasmid carrying CS30.

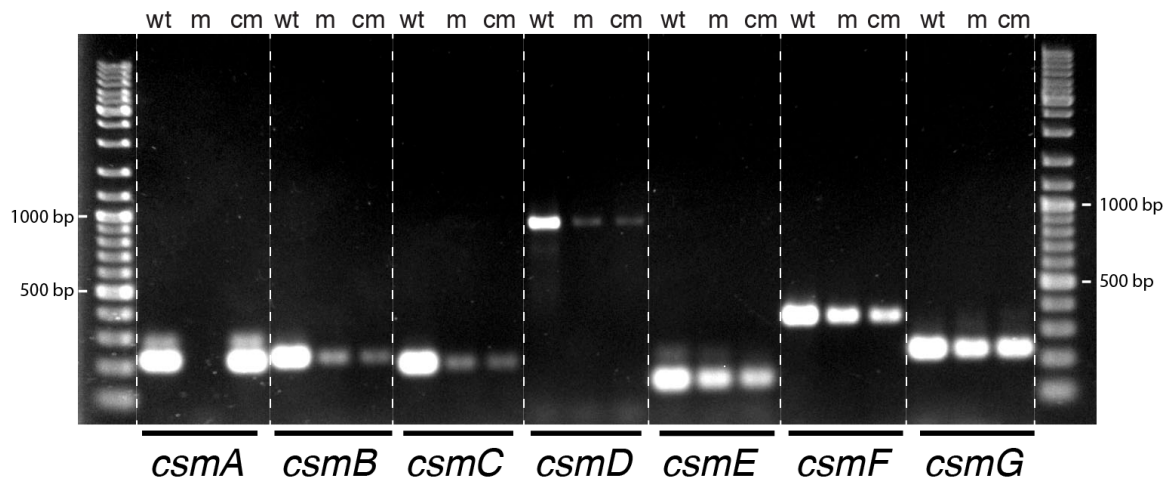

**Figure S4. Gene expression of *csmA-G*.** Specific primers were used to amplify fragments within the genes encoding CsmA-G by regular PCR. The major subunit (*csmA*) is not expressed in the mutant (m), E873  $\Delta$ *csmA*, where a Kanamycin cassette was inserted. The wildtype strain (wt), E873, and the complemented mutant (cm), E873  $\Delta$ *csmA* pMT-*csmA*, express all genes (*csmA-csmG*). PCR products: *csmA* = 218 bp; *csmB* = 230 bp; *csmC* = 208 bp; *csmD* = 879 bp; *csmE* = 142 bp; *csmF* = 348 bp; *csmG* = 232 bp.

## TABLES

**Table S1. Characteristics of human ETEC CFs.**

| CF                                | Morphology <sup>a,1</sup> |        | Size (kD) <sup>b,1</sup> | Accession number | Refs    |
|-----------------------------------|---------------------------|--------|--------------------------|------------------|---------|
| <b>CFA/-like group</b>            |                           |        |                          |                  |         |
| CFA/I                             | F                         | 7 nm   | 25.0                     | M55661.1         | 2,3     |
| CS1                               | F                         | 7 nm   | 15.2                     | AY536429.1       | 4-7     |
| CS2                               | F                         | 7 nm   | 15.4                     | Z47800           | 5,7,8   |
| CS4                               | F                         | 6 nm   | 15.0                     | AF296132.1       | 9       |
| CS14                              | F                         | 7 nm   | 15.0/15.5                | AY283611         | 10      |
| CS17                              | F                         | 7 nm   | 15.5                     | AY515609.1       | 11      |
| CS19                              | F                         | 7 nm   | 15.0                     | AY288101.1       | 11      |
| PCFO71*                           | n.d.                      | n.d.   | n.d.                     | AY513487.1       | 12      |
| <b>CS5-like group</b>             |                           |        |                          |                  |         |
| CS5                               | H                         | 5 nm   | 18.6                     | AJ224079         | 13      |
| CS7                               | H                         | 3-6 nm | 18.7                     | AY009095.1       | 14      |
| <b>Class Ib-group<sup>c</sup></b> |                           |        |                          |                  |         |
| CS12                              | F                         | 7 nm   | 17.9                     | AY009096.1       | 15      |
| CS18                              | F                         | 7 nm   | 18.5                     | AF335469.1       | 16      |
| CS20                              | F                         | 7 nm   | 17.5                     | AF438155         | 17      |
| CS26*                             | n.d.                      | n.d.   | n.d.                     | HQ203050         | 18      |
| CS27A*                            | n.d.                      | n.d.   | n.d.                     | HQ203047         | 18      |
| CS27B*                            | n.d.                      | n.d.   | n.d.                     | HQ203048         | 18      |
| CS28A*                            | n.d.                      | n.d.   | n.d.                     | HQ203049         | 18      |
| CS28B*                            | n.d.                      | n.d.   | n.d.                     | HQ203046         | 18      |
| <b>Additional</b>                 |                           |        |                          |                  |         |
| CS3                               | f                         | 2-3 nm | 15.0                     | FN822745.1       | 5,7,19  |
| CS6                               | nF                        |        | 15.1/15.9                | U04844           | 9,20,21 |
| CS8                               | F                         | 7 nm   | 25.3                     | AB059751         | 22      |
| CS21                              | F                         | 7 nm   | 25.2                     | EF59570.1        | 23      |
| CS15                              | nF                        |        | 18.2                     | X65623           | 24      |
| CS22                              | f                         | n.d.   | 15.0                     | AF145205.1       | 25      |
| CS10                              | nF                        |        | 16.0                     | n.a.             | 26      |
| CS11                              | f                         | 3 nm   | n.d.                     | n.a.             | 27      |
| CS13 <sup>d</sup>                 | f                         | n.d.   | 24.8                     | X71971           | 28      |
| CS23 <sup>d</sup>                 | f/nF                      |        | 16.9                     | JQ434477         | 29      |

<sup>a</sup> F = fimbrial; f = fibrillar; nF = non-fimbrial; H = helical.

<sup>b</sup> The size of the major subunit was predicted using the published amino acid sequences.

<sup>c</sup> All CFs in Class 1b are related to the porcine CF 987P (F6)<sup>18</sup>.

<sup>d</sup> CS13 and CS23 are related to the porcine CF K88 (F4)<sup>29</sup>.

n.d. = not determined.

n.a. = not available.

\* Putative ETEC CFs

**Table S2. Peptides identified by quantitative mass spectrometric (QMS) analyses in bacterial cultures grown at 37°C or 20°C.**

| Protein | Peptide Sequences                                 | ETEC isolates     |                    |                    |                    |
|---------|---------------------------------------------------|-------------------|--------------------|--------------------|--------------------|
|         |                                                   | E873<br>37°C/20°C | E1101<br>37°C/20°C | E1523<br>37°C/20°C | E1586<br>37°C/20°C |
| CsmF    | NTVLNFTENSSVK                                     | 1.6*              | 2.2                | 3.1                | 2.9                |
| CsmA    | VTSSLCQVK<br>SALAASGK<br>AGTVDATGVLIR<br>ATLNFSGR | 2.3               | 2.0                | 2.9                | 2.9                |

\*Numbers indicate the ratio of peptides identified in the samples cultured at 37°C and 20°C.

**Table S3. Adhesion of strains E873 (CS30), E873  $\Delta$ csmA and E873  $\Delta$ csmA pMT-csmA to Caco-2 cells**

| Strains                           | Caco-2 cells                                |
|-----------------------------------|---------------------------------------------|
|                                   | % cells with adherent bacteria <sup>b</sup> |
| E873 CS30 37°C <sup>a</sup>       | 92.9%±1.9                                   |
| E873 CS30 20°C <sup>a</sup>       | 4.2%±2.6                                    |
| E873 $\Delta$ csmA                | 2.9%±0.65                                   |
| E873 $\Delta$ csmA pMT-csmA +IPTG | 28.3%±12.5                                  |
| E873 $\Delta$ csmA pMT-csmA -IPTG | 4.5%±2.8                                    |

<sup>a</sup> Strain E873 was used as a representative strain for all four identified CS30 positive strains. Similar adhesion indexes were seen for all CS30 positive strains.

<sup>b</sup> Percent mean  $\pm$  of cells with at least one adhering bacterium.

**Table S4. Strains, plasmids and primers used in the study.**

| <b>Strains</b>                    | <b>Relevant characteristics</b>                                 | <b>Reference</b>                    |
|-----------------------------------|-----------------------------------------------------------------|-------------------------------------|
| <i>E. coli</i> S17-1              | λpir, auxotrophic to Proline                                    | Supplied by M. Lebens               |
| <i>E. coli</i> S17-1- (csmA::Kan) | λpir, auxotrophic to Proline, harboring pJT-SacB-Cm-(csmA::Kan) | This study                          |
| ETEC E873                         | LT, STp, CS30                                                   | icddr,b, Dhaka, Bangladesh          |
| ETEC E873 (ΔcsmA)                 | LT, STp, CS30 (csmA::Kan)                                       | This study                          |
| ETEC E873 (ΔcsmA pMT-csmA)        | LT, STp, CS30 (csmA::Kan), pMT-csmA                             | This study                          |
| <b>Plasmids</b>                   |                                                                 |                                     |
| pMT-SacB-Cm                       | Cm, suicide plasmid                                             | Supplied by M. Lebens <sup>30</sup> |
| pMT-SacB-Cm-(csmA::Kan)           | Cm, Kan, LT::Kan                                                | This study                          |
| pMT-ctxA                          | Cm                                                              | Supplied by M. Lebens               |
| <b>Primers*</b>                   | <b>Sequence (5'-3')</b>                                         | <b>Product (bp)</b>                 |
| CS30 detection                    |                                                                 |                                     |
| For-csmA                          | AGTCAGCTCTTGCAGCCAGT                                            | 219                                 |
| Rev-csmA                          | CCTTGGTACCATTGCTGGTT                                            |                                     |
| For-csmB                          | ATCCGTGTTCTCTGTTCGGG                                            | 230                                 |
| Rev-csmB                          | ACCATTCAAGGCTTTCGGGT                                            |                                     |
| For-csmC                          | GTGCAAGAGTTAGGTGTTGCTG                                          | 208                                 |
| Rev-csmC                          | GCGCTCGGCTTCTTTTCTTT                                            |                                     |
| For-csmD                          | TATTCGAGAGGCTGACGGGA                                            | 879                                 |
| Rev-csmD                          | TTATCGTTCCCCCAACTGCC                                            |                                     |
| For-csmE                          | ACCCAGGAAGTTTGGTTTGGT                                           | 142                                 |
| Rev-csmE                          | TCAGGAGTGCTTTTCGGGTA                                            |                                     |
| For-csmF                          | AGTTAGCGAACGGGGATCAA                                            | 348                                 |
| Rev-csmF                          | TATCTGTTCGGGACGACTTGC                                           |                                     |
| For-csmG                          | TGCTAATGACGGCACAGGAG                                            | 232                                 |
| Rev-csmG                          | CATGCGATAATACGCCCCCT                                            |                                     |
| Kanamycin insertion               |                                                                 |                                     |
| For-csmA                          | CCACTTTCTTCCAGCAACCA                                            |                                     |
| For-csmA-Litmus3                  | CTGGCGTAGCTTGGCGTAATCATGGGTCACACGCCCTGAAAAGTT                   |                                     |
| Rev-csmA                          | TGAGGGCTCTACCCTGAAAA                                            |                                     |
| Rev-csmA-Litmus2                  | CTGGCGTAATAGCGAAGAGGCCCTGCGTGCCTACATTGGTACT                     |                                     |
| For-upstream-csmA                 | TGCAACGCAGTGCTTAAATC                                            |                                     |
| Rev-Downstream-csmA               | CATCACCCGAACAGAGAACA                                            |                                     |
| Litmus 3                          | GGGCTCTTCGCTATTACGCCAG                                          |                                     |
| Litmus 2                          | CCATGATTACCCAAGCTACGCCAG                                        |                                     |

\*All primers have been designed in this study.

## REFERENCES

1. Gaastra, W. & Svennerholm, A. M. Colonization factors of human enterotoxigenic *Escherichia coli* (ETEC). *Trends Microbiol* **4**, 444–452 (1996).
2. Evans, D. G., Evans, D. J., Tjoa, W. S. & DuPont, H. L. Detection and characterization of colonization factor of enterotoxigenic *Escherichia coli* isolated from adults with diarrhea. *Infect Immun* **19**, 727–736 (1978).
3. Jordi, B. J., Willshaw, G. A., van der Zeijst, B. A. & Gaastra, W. The complete nucleotide sequence of region 1 of the CFA/I fimbrial operon of human enterotoxigenic *Escherichia coli*. *DNA Seq* **2**, 257–263 (1992).
4. Marron, M. B. & Smyth, C. J. Molecular analysis of the cso operon of enterotoxigenic *Escherichia coli* reveals that CsoA is the adhesin of CS1 fimbriae and that the accessory genes are interchangeable with those of the cfa operon. *Microbiology* **141** ( Pt 11), 2849–2859 (1995).
5. Evans, D. G. & Evans, D. J. New surface-associated heat-labile colonization factor antigen (CFA/II) produced by enterotoxigenic *Escherichia coli* of serogroups O6 and O8. *Infect Immun* **21**, 638–647 (1978).
6. Boylan, M., Smyth, C. J. & Scott, J. R. Nucleotide sequence of the gene encoding the major subunit of CS3 fimbriae of enterotoxigenic *Escherichia coli*. *Infect Immun* **56**, 3297–3300 (1988).
7. Smyth, C. J. Two mannose-resistant haemagglutinins on enterotoxigenic *Escherichia coli* of serotype O6:K15:H16 or H-isolated from travellers' and infantile diarrhoea. *J Gen Microbiol* **128**, 2081–2096 (1982).
8. Froehlich, B. J., Karakashian, A., Sakellaris, H. & Scott, J. R. Genes for CS2 pili of enterotoxigenic *Escherichia coli* and their interchangeability with those for CS1 pili. *Infect Immun* **63**, 4849–4856 (1995).
9. Thomas, L. V., McConnell, M. M., Rowe, B. & Field, A. M. The possession of three novel coli surface antigens by enterotoxigenic *Escherichia coli* strains positive for the putative colonization factor PCF8775. *J Gen Microbiol* **131**, 2319–2326 (1985).
10. McConnell, M. M., Chart, H., Field, A. M., Hibberd, M. & Rowe, B. Characterization of a putative colonization factor (PCFO166) of enterotoxigenic *Escherichia coli* of serogroup O166. *J Gen Microbiol* **135**, 1135–1144 (1989).
11. McConnell, M. M., Hibberd, M., Field, A. M., Chart, H. & Rowe, B. Characterization of a new putative colonization factor (CS17) from a human enterotoxigenic *Escherichia coli* of serotype O114:H21 which produces only heat-labile enterotoxin. *J Infect Dis* **161**, 343–347 (1990).
12. Anantha, R. P. *et al.* Evolutionary and functional relationships of colonization factor antigen i and other class 5 adhesive fimbriae of enterotoxigenic *Escherichia coli*. *Infect Immun* **72**, 7190–7201 (2004).
13. Clark, C. A., Heuzenroeder, M. W. & Manning, P. A. Colonization factor antigen CFA/IV (PCF8775) of human enterotoxigenic *Escherichia coli*: nucleotide sequence of the CS5 determinant. *Infect Immun* **60**, 1254–1257 (1992).
14. Hibberd, M. L., McConnell, M. M., Field, A. M. & Rowe, B. The fimbriae of human enterotoxigenic *Escherichia coli* strain 334 are related to CS5 fimbriae. *J Gen Microbiol* **136**, 2449–2456 (1990).
15. Tacket, C. O., Maneval, D. R. & Levine, M. M. Purification, morphology, and genetics of a new fimbrial putative colonization factor of enterotoxigenic *Escherichia coli* O159:H4. *Infect Immun* **55**, 1063–1069 (1987).
16. Viboud, G. I., Binsztein, N. & Svennerholm, A. M. A new fimbrial putative colonization factor, PCFO20, in human enterotoxigenic *Escherichia coli*. *Infect Immun*



- 61**, 5190–5197 (1993).
17. Valvatne, H., Sommerfelt, H., Gaastra, W., Bhan, M. K. & Grewal, H. M. Identification and characterization of CS20, a new putative colonization factor of enterotoxigenic *Escherichia coli*. *Infect Immun* **64**, 2635–2642 (1996).
  18. Nada, R. A. *et al.* Discovery and phylogenetic analysis of novel members of class b enterotoxigenic *Escherichia coli* adhesive fimbriae. *J Clin Microbiol* **49**, 1403–1410 (2011).
  19. Jalajakumari, M. B., Thomas, C. J., Halter, R. & Manning, P. A. Genes for biosynthesis and assembly of CS3 pili of CFA/II enterotoxigenic *Escherichia coli*: novel regulation of pilus production by bypassing an amber codon. *Mol Microbiol* **3**, 1685–1695 (1989).
  20. McConnell, M. M., Thomas, L. V., Scotland, S. M. & Rowe, B. The possession of coli surface antigen CS6 by enterotoxigenic *Escherichia coli* of serogroups O25, O27, O148, and O159: a possible colonization factor? *Curr Microbiol* **14**, 51–54 (1986).
  21. Svennerholm, A. M., Vidal, Y. L., Holmgren, J., McConnell, M. M. & Rowe, B. Role of PCF8775 antigen and its coli surface subcomponents for colonization, disease, and protective immunogenicity of enterotoxigenic *Escherichia coli* in rabbits. *Infect Immun* **56**, 523–528 (1988).
  22. Taniguchi, T., Fujino, Y., Yamamoto, K., Miwatani, T. & Honda, T. Sequencing of the gene encoding the major pilin of pilus colonization factor antigen III (CFA/III) of human enterotoxigenic *Escherichia coli* and evidence that CFA/III is related to type IV pili. *Infect Immun* **63**, 724–728 (1995).
  23. Giron, J. A., Levine, M. M. & Kaper, J. B. Longus: a long pilus ultrastructure produced by human enterotoxigenic *Escherichia coli*. *Mol Microbiol* **12**, 71–82 (1994).
  24. Aubel, D., Darfeuille-Michaud, A. & Joly, B. New adhesive factor (antigen 8786) on a human enterotoxigenic *Escherichia coli* O117:H4 strain isolated in Africa. *Infect Immun* **59**, 1290–1299 (1991).
  25. Pichel, M., Binsztein, N. & Viboud, G. CS22, a novel human enterotoxigenic *Escherichia coli* adhesin, is related to CS15. *Infect Immun* **68**, 3280–3285 (2000).
  26. Forestier, C., Welinder, K. G., Darfeuille-Michaud, A. & Klemm, P. Afimbrial adhesin from *Escherichia coli* strain 2230: Purification, characterization and partial covalent structure. *FEMS Microbiol Lett* **40**, 47–50 (1987).
  27. Knutton, S., Lloyd, D. R. & McNeish, A. S. Identification of a new fimbrial structure in enterotoxigenic *Escherichia coli* (ETEC) serotype O148:H28 which adheres to human intestinal mucosa: a potentially new human ETEC colonization factor. *Infect Immun* **55**, 86–92 (1987).
  28. Heuzenroeder, M. W., Elliot, T. R., Thomas, C. J., Halter, R. & Manning, P. A. A new fimbrial type (PCFO9) on enterotoxigenic *Escherichia coli* 09:H- LT+ isolated from a case of infant diarrhea in central Australia. *FEMS Microbiol Lett* **54**, 55–60 (1990).
  29. Del Canto, F. *et al.* Identification of coli surface antigen 23, a novel adhesin of enterotoxigenic *Escherichia coli*. *Infect Immun* **80**, 2791–2801 (2012).
  30. Karlsson, S. L. *et al.* Development of stable *Vibrio cholerae* O1 Hikojima type vaccine strains co-expressing the Inaba and Ogawa lipopolysaccharide antigens. *PloS one* **9**, e108521 (2014).
